# Supplementary material
Source: PubMed Central journal article supplement (PMC11107424)
Supplement: NIHMS1991477-supplement-Figure_S1.pdf [file NIHMS1991477-supplement-Figure_S1.pdf]

## Supporting Information

### Differential Spreading of Rhamnolipid Congeners from *Pseudomonas aeruginosa*

Abigail A. Weaver<sup>a#</sup>, Dharmeshkumar Parmar<sup>b#</sup>, Ella A. Junker<sup>a</sup>, Jonathan V. Sweedler<sup>b</sup>, Joshua D. Shrout<sup>a,c\*</sup>

<sup>a</sup>Department of Civil and Environmental Engineering and Earth Sciences, University of Notre Dame, Notre Dame, Indiana 46556, United States

<sup>b</sup>Department of Chemistry and Beckman Institute for Advanced Science and Technology, University of Illinois at Urbana-Champaign, Urbana, Illinois 61801, United States

<sup>c</sup>Department of Biological Sciences, University of Notre Dame, Notre Dame, Indiana 46556, United States

# AAW and DP contributed equally to this work.

\*Corresponding author, Joshua.Shrout@nd.edu

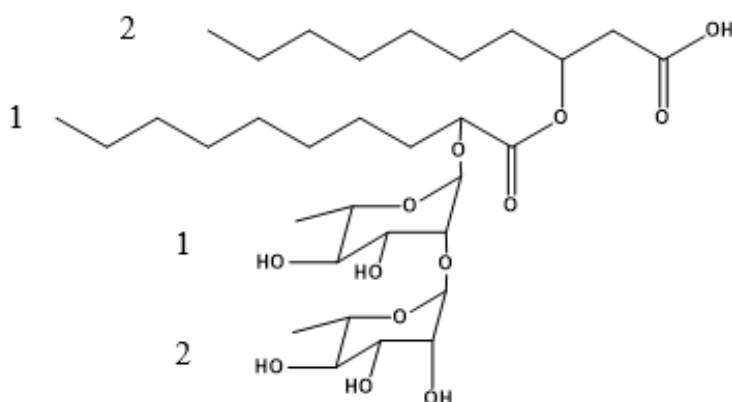

**Figure S1.** Rhamnolipid congeners are composed of either 1 or 2 rhamnose moieties with either 1 or 2 fatty acid chains that vary from 8-14 carbons in length.
