# Supplementary material
Source: PubMed Central journal article supplement (PMC11107424)
Supplement: NIHMS1991477-supplement-Table_S1.pdf [file NIHMS1991477-supplement-Table_S1.pdf]

**Table S1.** Rhamnolipid congeners detected in spent media.

| <b>Rhamnolipid congener</b> | <b>Total carbon*</b> | <b>Theoretical m/z</b> |
|-----------------------------|----------------------|------------------------|
| Rha-C10 [M+Na]              | C16                  | 357.1884               |
| Rha-Rha-C10 [M+Na]          | C22                  | 499.2878               |
| Rha-C18 [M+Na]              | C24                  | 503.2463               |
| Rha-C20 [M+Na]              | C26                  | 527.3191               |
| Rha-C22:1 [M+Na]            | C28                  | 553.3347               |
| Rha-C22 [M+Na]              | C28                  | 555.3504               |
| Rha-Rha-C18 [M+Na]          | C30                  | 645.3457               |
| Rha-Rha-C20 [M+Na]          | C32                  | 673.377                |
| Rha-Rha-C22:1 [M+Na]        | C34                  | 699.3926               |
| Rha-Rha-C22 [M+Na]          | C34                  | 701.4083               |
| Rha-Rha-C24:1 [M+Na]        | C36                  | 727.4239               |
| Rha-Rha-C24 [M+Na]          | C36                  | 729.4396               |

\*Total carbon is sum of carbons from both fatty acid chain(s) and rhamnose moieties. It was used to differentiate rhamnolipids varying in number of rhamnose moieties with the same total fatty acids chain length.
