# Supplementary material
Source: PubMed Central journal article supplement (PMC11107424)
Supplement: NIHMS1991477-supplement-Table_S2.pdf [file NIHMS1991477-supplement-Table_S2.pdf]

|                   |                   | Total carbon | C16   | C22   | C24   | C26   | C28:db | C28   | C30   | C32   | C34:db | C34   | C36:db | C36   |
|-------------------|-------------------|--------------|-------|-------|-------|-------|--------|-------|-------|-------|--------|-------|--------|-------|
| Replicate 1       | Rha-C10           | C16          | 1.000 | 0.090 | 0.097 | 0.115 | 0.079  | 0.091 | 0.093 | 0.114 | 0.114  | 0.116 | 0.027  | 0.065 |
|                   | Rha-Rha-C10       | C22          | 0.090 | 1.000 | 0.568 | 0.626 | 0.387  | 0.511 | 0.563 | 0.612 | 0.633  | 0.664 | 0.147  | 0.332 |
|                   | Rha-C8-C10        | C24          | 0.097 | 0.568 | 1.000 | 0.735 | 0.440  | 0.601 | 0.656 | 0.720 | 0.741  | 0.775 | 0.160  | 0.374 |
|                   | Rha-C10-C10       | C26          | 0.115 | 0.626 | 0.735 | 1.000 | 0.482  | 0.573 | 0.752 | 0.958 | 0.819  | 0.832 | 0.185  | 0.393 |
|                   | Rha-C12:1-C10     | C28:db       | 0.079 | 0.387 | 0.440 | 0.482 | 1.000  | 0.462 | 0.410 | 0.478 | 0.506  | 0.541 | 0.121  | 0.282 |
|                   | Rha-C10-C12       | C28          | 0.091 | 0.511 | 0.601 | 0.573 | 0.462  | 1.000 | 0.548 | 0.589 | 0.670  | 0.759 | 0.190  | 0.506 |
|                   | Rha-Rha-C8-C10    | C30          | 0.093 | 0.563 | 0.656 | 0.752 | 0.410  | 0.548 | 1.000 | 0.728 | 0.723  | 0.753 | 0.174  | 0.382 |
|                   | Rha-Rha-C10-C10   | C32          | 0.114 | 0.612 | 0.720 | 0.958 | 0.478  | 0.589 | 0.728 | 1.000 | 0.817  | 0.819 | 0.177  | 0.385 |
|                   | Rha-Rha-C12:1-C10 | C34:db       | 0.114 | 0.633 | 0.741 | 0.819 | 0.506  | 0.670 | 0.723 | 0.817 | 1.000  | 0.902 | 0.193  | 0.401 |
|                   | Rha-Rha-C10-C12   | C34          | 0.116 | 0.664 | 0.775 | 0.832 | 0.541  | 0.759 | 0.753 | 0.819 | 0.902  | 1.000 | 0.212  | 0.449 |
| Rha-Rha-C12-C12:1 | C36:db            | 0.027        | 0.147 | 0.160 | 0.185 | 0.121 | 0.190  | 0.174 | 0.177 | 0.193 | 0.212  | 1.000 | 0.167  |       |
| Rha-Rha-C12-C12   | C36               | 0.065        | 0.332 | 0.374 | 0.393 | 0.282 | 0.506  | 0.382 | 0.385 | 0.401 | 0.449  | 0.167 | 1.000  |       |
| Replicate 2       | Rha-C10           | C16          | 1.000 | 0.193 | 0.141 | 0.207 | 0.076  | 0.080 | 0.117 | 0.335 | 0.228  | 0.217 | 0.037  | 0.044 |
|                   | Rha-Rha-C10       | C22          | 0.193 | 1.000 | 0.717 | 0.834 | 0.324  | 0.541 | 0.742 | 0.683 | 0.840  | 0.838 | 0.241  | 0.312 |
|                   | Rha-C8-C10        | C24          | 0.141 | 0.717 | 1.000 | 0.804 | 0.313  | 0.513 | 0.757 | 0.579 | 0.773  | 0.758 | 0.232  | 0.307 |
|                   | Rha-C10-C10       | C26          | 0.207 | 0.834 | 0.804 | 1.000 | 0.361  | 0.588 | 0.835 | 0.760 | 0.927  | 0.910 | 0.250  | 0.325 |
|                   | Rha-C12:1-C10     | C28:db       | 0.076 | 0.324 | 0.313 | 0.361 | 1.000  | 0.314 | 0.332 | 0.249 | 0.350  | 0.375 | 0.159  | 0.189 |
|                   | Rha-C10-C12       | C28          | 0.080 | 0.541 | 0.513 | 0.588 | 0.314  | 1.000 | 0.566 | 0.323 | 0.569  | 0.685 | 0.458  | 0.664 |
|                   | Rha-Rha-C8-C10    | C30          | 0.117 | 0.742 | 0.757 | 0.835 | 0.332  | 0.566 | 1.000 | 0.517 | 0.794  | 0.784 | 0.249  | 0.333 |
|                   | Rha-Rha-C10-C10   | C32          | 0.335 | 0.683 | 0.579 | 0.760 | 0.249  | 0.323 | 0.517 | 1.000 | 0.809  | 0.768 | 0.157  | 0.178 |
|                   | Rha-Rha-C12:1-C10 | C34:db       | 0.228 | 0.840 | 0.773 | 0.927 | 0.350  | 0.569 | 0.794 | 0.809 | 1.000  | 0.947 | 0.265  | 0.322 |
|                   | Rha-Rha-C10-C12   | C34          | 0.217 | 0.838 | 0.758 | 0.910 | 0.375  | 0.685 | 0.784 | 0.768 | 0.947  | 1.000 | 0.333  | 0.404 |
| Rha-Rha-C12-C12:1 | C36:db            | 0.037        | 0.241 | 0.232 | 0.250 | 0.159 | 0.458  | 0.249 | 0.157 | 0.265 | 0.333  | 1.000 | 0.464  |       |
| Rha-Rha-C12-C12   | C36               | 0.044        | 0.312 | 0.307 | 0.325 | 0.189 | 0.664  | 0.333 | 0.178 | 0.322 | 0.404  | 0.464 | 1.000  |       |
| Replicate 2       | Rha-C10           | C16          | 1.000 | 0.151 | 0.133 | 0.150 | 0.109  | 0.125 | 0.133 | 0.153 | 0.140  | 0.147 | 0.057  | 0.068 |
|                   | Rha-Rha-C10       | C22          | 0.151 | 1.000 | 0.661 | 0.734 | 0.457  | 0.504 | 0.705 | 0.758 | 0.669  | 0.636 | 0.187  | 0.267 |
|                   | Rha-C8-C10        | C24          | 0.133 | 0.661 | 1.000 | 0.838 | 0.540  | 0.694 | 0.804 | 0.816 | 0.751  | 0.733 | 0.239  | 0.395 |
|                   | Rha-C10-C10       | C26          | 0.150 | 0.734 | 0.838 | 1.000 | 0.621  | 0.754 | 0.880 | 0.973 | 0.863  | 0.838 | 0.270  | 0.435 |
|                   | Rha-C12:1-C10     | C28:db       | 0.109 | 0.457 | 0.540 | 0.621 | 1.000  | 0.588 | 0.554 | 0.598 | 0.584  | 0.622 | 0.195  | 0.325 |
|                   | Rha-C10-C12       | C28          | 0.125 | 0.504 | 0.694 | 0.754 | 0.588  | 1.000 | 0.686 | 0.711 | 0.693  | 0.784 | 0.288  | 0.506 |
|                   | Rha-Rha-C8-C10    | C30          | 0.133 | 0.705 | 0.804 | 0.880 | 0.554  | 0.686 | 1.000 | 0.864 | 0.797  | 0.770 | 0.257  | 0.416 |
|                   | Rha-Rha-C10-C10   | C32          | 0.153 | 0.758 | 0.816 | 0.973 | 0.598  | 0.711 | 0.864 | 1.000 | 0.867  | 0.831 | 0.259  | 0.410 |
|                   | Rha-Rha-C12:1-C10 | C34:db       | 0.140 | 0.669 | 0.751 | 0.863 | 0.584  | 0.693 | 0.797 | 0.867 | 1.000  | 0.916 | 0.263  | 0.391 |
|                   | Rha-Rha-C10-C12   | C34          | 0.147 | 0.636 | 0.733 | 0.838 | 0.622  | 0.784 | 0.770 | 0.831 | 0.916  | 1.000 | 0.300  | 0.438 |
| Rha-Rha-C12-C12:1 | C36:db            | 0.057        | 0.187 | 0.239 | 0.270 | 0.195 | 0.288  | 0.257 | 0.259 | 0.263 | 0.300  | 1.000 | 0.235  |       |
| Rha-Rha-C12-C12   | C36               | 0.068        | 0.267 | 0.395 | 0.435 | 0.325 | 0.506  | 0.416 | 0.410 | 0.391 | 0.438  | 0.235 | 1.000  |       |
| Average (n=3)     | Rha-C10           | C16          | 1.000 | 0.145 | 0.124 | 0.157 | 0.088  | 0.099 | 0.114 | 0.201 | 0.161  | 0.160 | 0.040  | 0.059 |
|                   | Rha-Rha-C10       | C22          | 0.145 | 1.000 | 0.649 | 0.731 | 0.389  | 0.519 | 0.670 | 0.684 | 0.714  | 0.713 | 0.192  | 0.304 |
|                   | Rha-C8-C10        | C24          | 0.124 | 0.649 | 1.000 | 0.792 | 0.431  | 0.603 | 0.739 | 0.705 | 0.755  | 0.755 | 0.210  | 0.359 |
|                   | Rha-C10-C10       | C26          | 0.157 | 0.731 | 0.792 | 1.000 | 0.488  | 0.638 | 0.822 | 0.897 | 0.870  | 0.860 | 0.235  | 0.384 |
|                   | Rha-C12:1-C10     | C28:db       | 0.088 | 0.389 | 0.431 | 0.488 | 1.000  | 0.455 | 0.432 | 0.442 | 0.480  | 0.513 | 0.158  | 0.265 |
|                   | Rha-C10-C12       | C28          | 0.099 | 0.519 | 0.603 | 0.638 | 0.455  | 1.000 | 0.600 | 0.541 | 0.644  | 0.743 | 0.312  | 0.559 |
|                   | Rha-Rha-C8-C10    | C30          | 0.114 | 0.670 | 0.739 | 0.822 | 0.432  | 0.600 | 1.000 | 0.703 | 0.771  | 0.769 | 0.227  | 0.377 |
|                   | Rha-Rha-C10-C10   | C32          | 0.201 | 0.684 | 0.705 | 0.897 | 0.442  | 0.541 | 0.703 | 1.000 | 0.831  | 0.806 | 0.198  | 0.324 |
|                   | Rha-Rha-C12:1-C10 | C34:db       | 0.161 | 0.714 | 0.755 | 0.870 | 0.480  | 0.644 | 0.771 | 0.831 | 1.000  | 0.922 | 0.240  | 0.371 |
|                   | Rha-Rha-C10-C12   | C34          | 0.160 | 0.713 | 0.755 | 0.860 | 0.513  | 0.743 | 0.769 | 0.806 | 0.922  | 1.000 | 0.282  | 0.430 |
| Rha-Rha-C12-C12:1 | C36:db            | 0.040        | 0.192 | 0.210 | 0.235 | 0.158 | 0.312  | 0.227 | 0.198 | 0.240 | 0.282  | 1.000 | 0.289  |       |
| Rha-Rha-C12-C12   | C36               | 0.059        | 0.304 | 0.359 | 0.384 | 0.265 | 0.559  | 0.377 | 0.324 | 0.371 | 0.430  | 0.289 | 1.000  |       |
