# Supplementary material
Source: PubMed Central journal article supplement (PMC11107424)
Supplement: NIHMS1991477-supplement-Table_S3.pdf [file NIHMS1991477-supplement-Table_S3.pdf]

|                   | Total carbon      | C16           | C22        | C24   | C26   | C28:db | C28   | C30   | C32   | C34:db | C34   | C36:db | C36   |        |
|-------------------|-------------------|---------------|------------|-------|-------|--------|-------|-------|-------|--------|-------|--------|-------|--------|
| Replicate 1       | Rha-C10           | <b>C16</b>    | 1          | 0.925 | 0.905 | 0.885  | 0.804 | 0.721 | 0.828 | 0.855  | 0.881 | 0.836  | 0.388 | 0.121  |
|                   | Rha-Rha-C10       | <b>C22</b>    | 0.925      | 1     | 0.913 | 0.894  | 0.823 | 0.726 | 0.827 | 0.892  | 0.927 | 0.874  | 0.409 | 0.126  |
|                   | Rha-C8-C10        | <b>C24</b>    | 0.905      | 0.913 | 1     | 0.933  | 0.866 | 0.783 | 0.885 | 0.815  | 0.861 | 0.824  | 0.432 | 0.153  |
|                   | Rha-C10-C10       | <b>C26</b>    | 0.885      | 0.894 | 0.933 | 1      | 0.933 | 0.861 | 0.875 | 0.799  | 0.89  | 0.881  | 0.48  | 0.177  |
|                   | Rha-C12:1-C10     | <b>C28:db</b> | 0.804      | 0.823 | 0.866 | 0.933  | 1     | 0.949 | 0.796 | 0.667  | 0.847 | 0.893  | 0.523 | 0.22   |
|                   | Rha-C10-C12       | <b>C28</b>    | 0.721      | 0.726 | 0.783 | 0.861  | 0.949 | 1     | 0.695 | 0.548  | 0.767 | 0.854  | 0.513 | 0.231  |
|                   | Rha-Rha-C8-C10    | <b>C30</b>    | 0.828      | 0.827 | 0.885 | 0.875  | 0.796 | 0.695 | 1     | 0.779  | 0.789 | 0.743  | 0.408 | 0.139  |
|                   | Rha-Rha-C10-C10   | <b>C32</b>    | 0.855      | 0.892 | 0.815 | 0.799  | 0.667 | 0.548 | 0.779 | 1      | 0.888 | 0.787  | 0.299 | 0.0648 |
|                   | Rha-Rha-C12:1-C10 | <b>C34:db</b> | 0.881      | 0.927 | 0.861 | 0.89   | 0.847 | 0.767 | 0.789 | 0.888  | 1     | 0.956  | 0.415 | 0.123  |
|                   | Rha-Rha-C10-C12   | <b>C34</b>    | 0.836      | 0.874 | 0.824 | 0.881  | 0.893 | 0.854 | 0.743 | 0.787  | 0.956 | 1      | 0.46  | 0.153  |
|                   | Rha-Rha-C12-C12:1 | <b>C36:db</b> | 0.388      | 0.409 | 0.432 | 0.48   | 0.523 | 0.513 | 0.408 | 0.299  | 0.415 | 0.46   | 1     | 0.176  |
|                   | Rha-Rha-C12-C12   | <b>C36</b>    | 0.121      | 0.126 | 0.153 | 0.177  | 0.22  | 0.231 | 0.139 | 0.0648 | 0.123 | 0.153  | 0.176 | 1      |
|                   | Replicate 2       | Rha-C10       | <b>C16</b> | 1     | 0.894 | 0.897  | 0.887 | 0.889 | 0.852 | 0.85   | 0.871 | 0.895  | 0.893 | 0.511  |
| Rha-Rha-C10       |                   | <b>C22</b>    | 0.894      | 1     | 0.897 | 0.887  | 0.881 | 0.848 | 0.865 | 0.854  | 0.886 | 0.886  | 0.525 | 0.293  |
| Rha-C8-C10        |                   | <b>C24</b>    | 0.897      | 0.897 | 1     | 0.899  | 0.918 | 0.9   | 0.863 | 0.869  | 0.905 | 0.917  | 0.503 | 0.295  |
| Rha-C10-C10       |                   | <b>C26</b>    | 0.887      | 0.887 | 0.899 | 1      | 0.918 | 0.895 | 0.839 | 0.966  | 0.899 | 0.912  | 0.537 | 0.313  |
| Rha-C12:1-C10     |                   | <b>C28:db</b> | 0.889      | 0.881 | 0.918 | 0.918  | 1     | 0.947 | 0.837 | 0.904  | 0.94  | 0.959  | 0.527 | 0.31   |
| Rha-C10-C12       |                   | <b>C28</b>    | 0.852      | 0.848 | 0.9   | 0.895  | 0.947 | 1     | 0.805 | 0.865  | 0.903 | 0.94   | 0.518 | 0.319  |
| Rha-Rha-C8-C10    |                   | <b>C30</b>    | 0.85       | 0.865 | 0.863 | 0.839  | 0.837 | 0.805 | 1     | 0.806  | 0.842 | 0.844  | 0.506 | 0.279  |
| Rha-Rha-C10-C10   |                   | <b>C32</b>    | 0.871      | 0.854 | 0.869 | 0.966  | 0.904 | 0.865 | 0.806 | 1      | 0.907 | 0.909  | 0.516 | 0.297  |
| Rha-Rha-C12:1-C10 |                   | <b>C34:db</b> | 0.895      | 0.886 | 0.905 | 0.899  | 0.94  | 0.903 | 0.842 | 0.907  | 1     | 0.967  | 0.525 | 0.3    |
| Rha-Rha-C10-C12   |                   | <b>C34</b>    | 0.893      | 0.886 | 0.917 | 0.912  | 0.959 | 0.94  | 0.844 | 0.909  | 0.967 | 1      | 0.539 | 0.315  |
| Rha-Rha-C12-C12:1 |                   | <b>C36:db</b> | 0.511      | 0.525 | 0.503 | 0.537  | 0.527 | 0.518 | 0.506 | 0.516  | 0.525 | 0.539  | 1     | 0.21   |
| Rha-Rha-C12-C12   |                   | <b>C36</b>    | 0.285      | 0.293 | 0.295 | 0.313  | 0.31  | 0.319 | 0.279 | 0.297  | 0.3   | 0.315  | 0.21  | 1      |
