# Supplementary material
Source: PubMed Central journal article supplement (PMC11107424)
Supplement: NIHMS1991477-supplement-Table_S4.pdf [file NIHMS1991477-supplement-Table_S4.pdf]

|             | Total carbon      | C16           | C22   | C24   | C26   | C28:db | C28   | C30   | C32   | C34:db | C34   | C36:db | C36   |       |
|-------------|-------------------|---------------|-------|-------|-------|--------|-------|-------|-------|--------|-------|--------|-------|-------|
| Replicate 1 | Rha-C10           | <b>C16</b>    | 1.000 | 0.506 | 0.641 | 0.601  | 0.532 | 0.412 | 0.579 | 0.517  | 0.570 | 0.569  | 0.000 | 0.000 |
|             | Rha-Rha-C10       | <b>C22</b>    | 0.506 | 1.000 | 0.747 | 0.699  | 0.572 | 0.432 | 0.706 | 0.634  | 0.663 | 0.657  | 0.000 | 0.000 |
|             | Rha-C8-C10        | <b>C24</b>    | 0.641 | 0.747 | 1.000 | 0.868  | 0.775 | 0.606 | 0.878 | 0.749  | 0.844 | 0.852  | 0.000 | 0.000 |
|             | Rha-C10-C10       | <b>C26</b>    | 0.601 | 0.699 | 0.868 | 1.000  | 0.684 | 0.487 | 0.802 | 0.903  | 0.780 | 0.751  | 0.000 | 0.001 |
|             | Rha-C12:1-C10     | <b>C28:db</b> | 0.532 | 0.572 | 0.775 | 0.684  | 1.000 | 0.742 | 0.660 | 0.564  | 0.765 | 0.816  | 0.001 | 0.000 |
|             | Rha-C10-C12       | <b>C28</b>    | 0.412 | 0.432 | 0.606 | 0.487  | 0.742 | 1.000 | 0.516 | 0.378  | 0.608 | 0.722  | 0.001 | 0.000 |
|             | Rha-Rha-C8-C10    | <b>C30</b>    | 0.579 | 0.706 | 0.878 | 0.802  | 0.660 | 0.516 | 1.000 | 0.730  | 0.780 | 0.782  | 0.000 | 0.000 |
|             | Rha-Rha-C10-C10   | <b>C32</b>    | 0.517 | 0.634 | 0.749 | 0.903  | 0.564 | 0.378 | 0.730 | 1.000  | 0.755 | 0.701  | 0.000 | 0.001 |
|             | Rha-Rha-C12:1-C10 | <b>C34:db</b> | 0.570 | 0.663 | 0.844 | 0.780  | 0.765 | 0.608 | 0.780 | 0.755  | 1.000 | 0.878  | 0.001 | 0.000 |
|             | Rha-Rha-C10-C12   | <b>C34</b>    | 0.569 | 0.657 | 0.852 | 0.751  | 0.816 | 0.722 | 0.782 | 0.701  | 0.878 | 1.000  | 0.001 | 0.000 |
|             | Rha-Rha-C12-C12:1 | <b>C36:db</b> | 0.000 | 0.000 | 0.000 | 0.000  | 0.001 | 0.001 | 0.000 | 0.000  | 0.001 | 0.001  | 1.000 | 0.000 |
|             | Rha-Rha-C12-C12   | <b>C36</b>    | 0.000 | 0.000 | 0.000 | 0.001  | 0.000 | 0.000 | 0.000 | 0.001  | 0.000 | 0.000  | 0.000 | 1.000 |
| Replicate 2 | Rha-C10           | <b>C16</b>    | 1.000 | 0.695 | 0.391 | 0.321  | 0.433 | 0.370 | 0.498 | 0.400  | 0.598 | 0.527  | 0.003 | 0.004 |
|             | Rha-Rha-C10       | <b>C22</b>    | 0.695 | 1.000 | 0.452 | 0.364  | 0.483 | 0.383 | 0.601 | 0.504  | 0.735 | 0.646  | 0.003 | 0.005 |
|             | Rha-C8-C10        | <b>C24</b>    | 0.391 | 0.452 | 1.000 | 0.908  | 0.743 | 0.777 | 0.757 | 0.807  | 0.672 | 0.629  | 0.000 | 0.000 |
|             | Rha-C10-C10       | <b>C26</b>    | 0.321 | 0.364 | 0.908 | 1.000  | 0.692 | 0.728 | 0.713 | 0.863  | 0.595 | 0.565  | 0.001 | 0.000 |
|             | Rha-C12:1-C10     | <b>C28:db</b> | 0.433 | 0.483 | 0.743 | 0.692  | 1.000 | 0.696 | 0.660 | 0.629  | 0.635 | 0.592  | 0.000 | 0.000 |
|             | Rha-C10-C12       | <b>C28</b>    | 0.370 | 0.383 | 0.777 | 0.728  | 0.696 | 1.000 | 0.629 | 0.605  | 0.549 | 0.550  | 0.000 | 0.000 |
|             | Rha-Rha-C8-C10    | <b>C30</b>    | 0.498 | 0.601 | 0.757 | 0.713  | 0.660 | 0.629 | 1.000 | 0.721  | 0.718 | 0.649  | 0.000 | 0.000 |
|             | Rha-Rha-C10-C10   | <b>C32</b>    | 0.400 | 0.504 | 0.807 | 0.863  | 0.629 | 0.605 | 0.721 | 1.000  | 0.695 | 0.647  | 0.000 | 0.000 |
|             | Rha-Rha-C12:1-C10 | <b>C34:db</b> | 0.598 | 0.735 | 0.672 | 0.595  | 0.635 | 0.549 | 0.718 | 0.695  | 1.000 | 0.725  | 0.001 | 0.001 |
|             | Rha-Rha-C10-C12   | <b>C34</b>    | 0.527 | 0.646 | 0.629 | 0.565  | 0.592 | 0.550 | 0.649 | 0.647  | 0.725 | 1.000  | 0.001 | 0.002 |
|             | Rha-Rha-C12-C12:1 | <b>C36:db</b> | 0.003 | 0.003 | 0.000 | 0.001  | 0.000 | 0.000 | 0.000 | 0.000  | 0.001 | 0.001  | 1.000 | 0.000 |
|             | Rha-Rha-C12-C12   | <b>C36</b>    | 0.004 | 0.005 | 0.000 | 0.000  | 0.000 | 0.000 | 0.000 | 0.000  | 0.001 | 0.002  | 0.000 | 1.000 |
