# Supplementary material
Source: PubMed Central journal article supplement (PMC11107424)
Supplement: NIHMS1991477-supplement-Table_S5.pdf [file NIHMS1991477-supplement-Table_S5.pdf]

|             | Total carbon      | C16           | C22   | C24   | C26   | C28:db | C28   | C30   | C32   | C34:db | C34   | C36:db | C36   |       |
|-------------|-------------------|---------------|-------|-------|-------|--------|-------|-------|-------|--------|-------|--------|-------|-------|
| Replicate 1 | Rha-C10           | <b>C16</b>    | 1.000 | 0.675 | 0.596 | 0.744  | 0.541 | 0.361 | 0.002 | 0.744  | 0.458 | 0.629  | 0.001 | 0.000 |
|             | Rha-Rha-C10       | <b>C22</b>    | 0.675 | 1.000 | 0.643 | 0.758  | 0.551 | 0.321 | 0.003 | 0.758  | 0.492 | 0.625  | 0.000 | 0.000 |
|             | Rha-C8-C10        | <b>C24</b>    | 0.596 | 0.643 | 1.000 | 0.731  | 0.509 | 0.281 | 0.003 | 0.710  | 0.481 | 0.564  | 0.000 | 0.000 |
|             | Rha-C10-C10       | <b>C26</b>    | 0.744 | 0.758 | 0.731 | 1.000  | 0.640 | 0.360 | 0.004 | 0.928  | 0.630 | 0.732  | 0.000 | 0.000 |
|             | Rha-C12:1-C10     | <b>C28:db</b> | 0.541 | 0.551 | 0.509 | 0.640  | 1.000 | 0.539 | 0.002 | 0.563  | 0.411 | 0.643  | 0.000 | 0.001 |
|             | Rha-C10-C12       | <b>C28</b>    | 0.361 | 0.321 | 0.281 | 0.360  | 0.539 | 1.000 | 0.001 | 0.276  | 0.210 | 0.535  | 0.000 | 0.001 |
|             | Rha-Rha-C8-C10    | <b>C30</b>    | 0.002 | 0.003 | 0.003 | 0.004  | 0.002 | 0.001 | 1.000 | 0.003  | 0.004 | 0.002  | 0.000 | 0.000 |
|             | Rha-Rha-C10-C10   | <b>C32</b>    | 0.744 | 0.758 | 0.710 | 0.928  | 0.563 | 0.276 | 0.003 | 1.000  | 0.600 | 0.690  | 0.000 | 0.000 |
|             | Rha-Rha-C12:1-C10 | <b>C34:db</b> | 0.458 | 0.492 | 0.481 | 0.630  | 0.411 | 0.210 | 0.004 | 0.600  | 1.000 | 0.477  | 0.000 | 0.000 |
|             | Rha-Rha-C10-C12   | <b>C34</b>    | 0.629 | 0.625 | 0.564 | 0.732  | 0.643 | 0.535 | 0.002 | 0.690  | 0.477 | 1.000  | 0.000 | 0.000 |
|             | Rha-Rha-C12-C12:1 | <b>C36:db</b> | 0.001 | 0.000 | 0.000 | 0.000  | 0.000 | 0.000 | 0.000 | 0.000  | 0.000 | 0.000  | 1.000 | 0.000 |
|             | Rha-Rha-C12-C12   | <b>C36</b>    | 0.000 | 0.000 | 0.000 | 0.000  | 0.001 | 0.001 | 0.000 | 0.000  | 0.000 | 0.000  | 0.000 | 1.000 |
| Replicate 2 | Rha-C10           | <b>C16</b>    | 1.000 | 0.736 | 0.606 | 0.698  | 0.528 | 0.205 | 0.362 | 0.568  | 0.743 | 0.665  | 0.049 | 0.042 |
|             | Rha-Rha-C10       | <b>C22</b>    | 0.736 | 1.000 | 0.566 | 0.666  | 0.291 | 0.052 | 0.371 | 0.615  | 0.681 | 0.445  | 0.015 | 0.004 |
|             | Rha-C8-C10        | <b>C24</b>    | 0.606 | 0.566 | 1.000 | 0.787  | 0.439 | 0.087 | 0.620 | 0.843  | 0.825 | 0.578  | 0.027 | 0.019 |
|             | Rha-C10-C10       | <b>C26</b>    | 0.698 | 0.666 | 0.787 | 1.000  | 0.534 | 0.134 | 0.501 | 0.812  | 0.856 | 0.654  | 0.031 | 0.023 |
|             | Rha-C12:1-C10     | <b>C28:db</b> | 0.528 | 0.291 | 0.439 | 0.534  | 1.000 | 0.650 | 0.240 | 0.304  | 0.582 | 0.900  | 0.146 | 0.151 |
|             | Rha-C10-C12       | <b>C28</b>    | 0.205 | 0.052 | 0.087 | 0.134  | 0.650 | 1.000 | 0.034 | 0.032  | 0.175 | 0.536  | 0.206 | 0.312 |
|             | Rha-Rha-C8-C10    | <b>C30</b>    | 0.362 | 0.371 | 0.620 | 0.501  | 0.240 | 0.034 | 1.000 | 0.582  | 0.530 | 0.338  | 0.014 | 0.007 |
|             | Rha-Rha-C10-C10   | <b>C32</b>    | 0.568 | 0.615 | 0.843 | 0.812  | 0.304 | 0.032 | 0.582 | 1.000  | 0.768 | 0.450  | 0.012 | 0.004 |
|             | Rha-Rha-C12:1-C10 | <b>C34:db</b> | 0.743 | 0.681 | 0.825 | 0.856  | 0.582 | 0.175 | 0.530 | 0.768  | 1.000 | 0.739  | 0.046 | 0.034 |
|             | Rha-Rha-C10-C12   | <b>C34</b>    | 0.665 | 0.445 | 0.578 | 0.654  | 0.900 | 0.536 | 0.338 | 0.450  | 0.739 | 1.000  | 0.126 | 0.125 |
|             | Rha-Rha-C12-C12:1 | <b>C36:db</b> | 0.049 | 0.015 | 0.027 | 0.031  | 0.146 | 0.206 | 0.014 | 0.012  | 0.046 | 0.126  | 1.000 | 0.070 |
|             | Rha-Rha-C12-C12   | <b>C36</b>    | 0.042 | 0.004 | 0.019 | 0.023  | 0.151 | 0.312 | 0.007 | 0.004  | 0.034 | 0.125  | 0.070 | 1.000 |
