# Supplementary material
Source: PubMed Central journal article supplement (PMC11107424)
Supplement: NIHMS1991477-supplement-Table_S6.pdf [file NIHMS1991477-supplement-Table_S6.pdf]

|             | Total carbon      | C16           | C22   | C24   | C26   | C28:db | C28   | C30   | C32   | C34:db | C34   | C36:db | C36   |       |
|-------------|-------------------|---------------|-------|-------|-------|--------|-------|-------|-------|--------|-------|--------|-------|-------|
| Replicate 1 | Rha-C10           | <b>C16</b>    | 1.000 | 0.783 | 0.312 | 0.700  | 0.699 | 0.612 | 0.473 | 0.693  | 0.765 | 0.763  | 0.578 | 0.412 |
|             | Rha-Rha-C10       | <b>C22</b>    | 0.783 | 1.000 | 0.499 | 0.804  | 0.811 | 0.777 | 0.694 | 0.804  | 0.840 | 0.818  | 0.745 | 0.613 |
|             | Rha-C8-C10        | <b>C24</b>    | 0.312 | 0.499 | 1.000 | 0.653  | 0.599 | 0.707 | 0.790 | 0.529  | 0.342 | 0.296  | 0.443 | 0.550 |
|             | Rha-C10-C10       | <b>C26</b>    | 0.700 | 0.804 | 0.653 | 1.000  | 0.839 | 0.810 | 0.771 | 0.916  | 0.715 | 0.679  | 0.681 | 0.617 |
|             | Rha-C12:1-C10     | <b>C28:db</b> | 0.699 | 0.811 | 0.599 | 0.839  | 1.000 | 0.897 | 0.714 | 0.818  | 0.813 | 0.779  | 0.712 | 0.632 |
|             | Rha-C10-C12       | <b>C28</b>    | 0.612 | 0.777 | 0.707 | 0.810  | 0.897 | 1.000 | 0.796 | 0.782  | 0.739 | 0.702  | 0.726 | 0.712 |
|             | Rha-Rha-C8-C10    | <b>C30</b>    | 0.473 | 0.694 | 0.790 | 0.771  | 0.714 | 0.796 | 1.000 | 0.688  | 0.541 | 0.495  | 0.660 | 0.713 |
|             | Rha-Rha-C10-C10   | <b>C32</b>    | 0.693 | 0.804 | 0.529 | 0.916  | 0.818 | 0.782 | 0.688 | 1.000  | 0.766 | 0.728  | 0.712 | 0.619 |
|             | Rha-Rha-C12:1-C10 | <b>C34:db</b> | 0.765 | 0.840 | 0.342 | 0.715  | 0.813 | 0.739 | 0.541 | 0.766  | 1.000 | 0.980  | 0.735 | 0.544 |
|             | Rha-Rha-C10-C12   | <b>C34</b>    | 0.763 | 0.818 | 0.296 | 0.679  | 0.779 | 0.702 | 0.495 | 0.728  | 0.980 | 1.000  | 0.714 | 0.515 |
|             | Rha-Rha-C12-C12:1 | <b>C36:db</b> | 0.578 | 0.745 | 0.443 | 0.681  | 0.712 | 0.726 | 0.660 | 0.712  | 0.735 | 0.714  | 1.000 | 0.692 |
|             | Rha-Rha-C12-C12   | <b>C36</b>    | 0.412 | 0.613 | 0.550 | 0.617  | 0.632 | 0.712 | 0.713 | 0.619  | 0.544 | 0.515  | 0.692 | 1.000 |
| Replicate 2 | Rha-C10           | <b>C16</b>    | 1.000 | 0.785 | 0.515 | 0.752  | 0.732 | 0.734 | 0.653 | 0.716  | 0.723 | 0.565  | 0.612 | 0.597 |
|             | Rha-Rha-C10       | <b>C22</b>    | 0.785 | 1.000 | 0.704 | 0.794  | 0.820 | 0.846 | 0.829 | 0.702  | 0.733 | 0.513  | 0.672 | 0.679 |
|             | Rha-C8-C10        | <b>C24</b>    | 0.515 | 0.704 | 1.000 | 0.666  | 0.707 | 0.734 | 0.815 | 0.429  | 0.377 | 0.163  | 0.385 | 0.445 |
|             | Rha-C10-C10       | <b>C26</b>    | 0.752 | 0.794 | 0.666 | 1.000  | 0.795 | 0.773 | 0.757 | 0.873  | 0.678 | 0.526  | 0.582 | 0.587 |
|             | Rha-C12:1-C10     | <b>C28:db</b> | 0.732 | 0.820 | 0.707 | 0.795  | 1.000 | 0.915 | 0.776 | 0.729  | 0.733 | 0.474  | 0.635 | 0.653 |
|             | Rha-C10-C12       | <b>C28</b>    | 0.734 | 0.846 | 0.734 | 0.773  | 0.915 | 1.000 | 0.818 | 0.705  | 0.738 | 0.472  | 0.674 | 0.705 |
|             | Rha-Rha-C8-C10    | <b>C30</b>    | 0.653 | 0.829 | 0.815 | 0.757  | 0.776 | 0.818 | 1.000 | 0.604  | 0.562 | 0.330  | 0.618 | 0.670 |
|             | Rha-Rha-C10-C10   | <b>C32</b>    | 0.716 | 0.702 | 0.429 | 0.873  | 0.729 | 0.705 | 0.604 | 1.000  | 0.778 | 0.667  | 0.654 | 0.629 |
|             | Rha-Rha-C12:1-C10 | <b>C34:db</b> | 0.723 | 0.733 | 0.377 | 0.678  | 0.733 | 0.738 | 0.562 | 0.778  | 1.000 | 0.864  | 0.709 | 0.660 |
|             | Rha-Rha-C10-C12   | <b>C34</b>    | 0.565 | 0.513 | 0.163 | 0.526  | 0.474 | 0.472 | 0.330 | 0.667  | 0.864 | 1.000  | 0.555 | 0.475 |
|             | Rha-Rha-C12-C12:1 | <b>C36:db</b> | 0.612 | 0.672 | 0.385 | 0.582  | 0.635 | 0.674 | 0.618 | 0.654  | 0.709 | 0.555  | 1.000 | 0.731 |
|             | Rha-Rha-C12-C12   | <b>C36</b>    | 0.597 | 0.679 | 0.445 | 0.587  | 0.653 | 0.705 | 0.670 | 0.629  | 0.660 | 0.475  | 0.731 | 1.000 |
